# Supplementary material
Source: publisher figshare collection journal article supplement (https://acs.figshare.com/ndownloader/files/4762534)
Supplement: Supplementary file 1 [file 4762534]

 

data_a 

 

_audit_creation_method            SHELXL-97 

_chemical_name_systematic 

; 

 ? 

; 

_chemical_name_common             ? 

_chemical_melting_point           ? 

_chemical_formula_moiety          ? 

_chemical_formula_sum 

 'C14 H22 N O5 P' 

_chemical_formula_weight          315.30 

 

loop_ 

 _atom_type_symbol 

 _atom_type_description 

 _atom_type_scat_dispersion_real 

 _atom_type_scat_dispersion_imag 

 _atom_type_scat_source 

 'C'  'C'   0.0033   0.0016 

 'International Tables Vol C Tables 4.2.6.8 and 6.1.1.4' 

 'H'  'H'   0.0000   0.0000 

 'International Tables Vol C Tables 4.2.6.8 and 6.1.1.4' 

 'N'  'N'   0.0061   0.0033 

 'International Tables Vol C Tables 4.2.6.8 and 6.1.1.4' 

 'O'  'O'   0.0106   0.0060 

 'International Tables Vol C Tables 4.2.6.8 and 6.1.1.4' 

 'P'  'P'   0.1023   0.0942 

 'International Tables Vol C Tables 4.2.6.8 and 6.1.1.4' 

 

_symmetry_cell_setting            Monoclinic 

_symmetry_space_group_name_H-M    P2(1)/c 

 

loop_ 

 _symmetry_equiv_pos_as_xyz 

 'x, y, z' 

 '-x, y+1/2, -z+1/2' 

 '-x, -y, -z' 

 'x, -y-1/2, z-1/2' 

 

_cell_length_a                    7.2504(15) 

_cell_length_b                    23.958(5) 

_cell_length_c                    9.5680(19) 

_cell_angle_alpha                 90.00 

_cell_angle_beta                  96.49(3) 

_cell_angle_gamma                 90.00 

_cell_volume                      1651.3(6) 

_cell_formula_units_Z             4 

_cell_measurement_temperature     293(2) 

_cell_measurement_reflns_used     15144 

_cell_measurement_theta_min       1.70 

_cell_measurement_theta_max       27.47 

 

_exptl_crystal_description        platelet 

_exptl_crystal_colour             colorless 

_exptl_crystal_size_max           0.76 

_exptl_crystal_size_mid           0.40 

_exptl_crystal_size_min           0.21 

_exptl_crystal_density_meas       ? 

_exptl_crystal_density_diffrn     1.268 

_exptl_crystal_density_method     'not measured' 

_exptl_crystal_F_000              672 

_exptl_absorpt_coefficient_mu     0.186 

_exptl_absorpt_correction_type    empirical 

_exptl_absorpt_correction_T_min   0.8719 

_exptl_absorpt_correction_T_max   0.9613 

_exptl_absorpt_process_details    abscor 

 

_exptl_special_details 

; 

 ? 

; 

 

_diffrn_ambient_temperature       293(2) 

_diffrn_radiation_wavelength      0.71073 

_diffrn_radiation_type            MoK\a 

_diffrn_radiation_source          'Rotating Anode' 

_diffrn_radiation_monochromator   graphite 

_diffrn_measurement_device_type   'Rigaku raxis Rapid IP Area Detector' 

_diffrn_measurement_method        '\w oscillation' 

_diffrn_detector_area_resol_mean  ? 

_diffrn_standards_number          ? 

_diffrn_standards_interval_count  ? 

_diffrn_standards_interval_time   ? 

_diffrn_standards_decay_%         ? 

_diffrn_reflns_number             15144

_diffrn_reflns_av_R_equivalents   0.0342 

_diffrn_reflns_av_sigmaI/netI     0.0349 

_diffrn_reflns_limit_h_min        -9 

_diffrn_reflns_limit_h_max        9 

_diffrn_reflns_limit_k_min        -30 

_diffrn_reflns_limit_k_max        31 

_diffrn_reflns_limit_l_min        -12 

_diffrn_reflns_limit_l_max        12 

_diffrn_reflns_theta_min          1.70 

_diffrn_reflns_theta_max          27.47 

_reflns_number_total              3798 

_reflns_number_gt                 2694 

_reflns_threshold_expression      >2sigma(I) 

 

_computing_data_collection        'Rapid auto(Rigaku 2001)' 

_computing_cell_refinement        'Rapid auto(Rigaku 2001)' 

_computing_data_reduction         'Rapid auto(Rigaku 2001)' 

_computing_structure_solution     'SHELXS-97 (Sheldrick, 1990)' 

_computing_structure_refinement   'SHELXL-97 (Sheldrick, 1997)' 

_computing_molecular_graphics     ? 

_computing_publication_material   ? 

 

_refine_special_details 

; 

 Refinement of F^2^ against ALL reflections.  The weighted R-factor wR and 

 goodness of fit S are based on F^2^, conventional R-factors R are based 

 on F, with F set to zero for negative F^2^. The threshold expression of 

 F^2^ > 2sigma(F^2^) is used only for calculating R-factors(gt) etc. and is 

 not relevant to the choice of reflections for refinement.  R-factors based 

 on F^2^ are statistically about twice as large as those based on F, and R- 

 factors based on ALL data will be even larger. 

; 

 

_refine_ls_structure_factor_coef  Fsqd  

_refine_ls_matrix_type            full 

_refine_ls_weighting_scheme       calc  

_refine_ls_weighting_details 

 'calc w=1/[\s^2^(Fo^2^)+(0.1078P)^2^+0.2226P] where P=(Fo^2^+2Fc^2^)/3' 

_atom_sites_solution_primary      direct 

_atom_sites_solution_secondary    difmap 

_atom_sites_solution_hydrogens    geom 

_refine_ls_hydrogen_treatment     constr 

_refine_ls_extinction_method      none 

_refine_ls_extinction_coef        ? 

_refine_ls_number_reflns          3798 

_refine_ls_number_parameters      190 

_refine_ls_number_restraints      0 

_refine_ls_R_factor_all           0.0807 

_refine_ls_R_factor_gt            0.0567 

_refine_ls_wR_factor_ref          0.1832 

_refine_ls_wR_factor_gt           0.1676 

_refine_ls_goodness_of_fit_ref    1.038 

_refine_ls_restrained_S_all       1.038 

_refine_ls_shift/su_max           0.000 

_refine_ls_shift/su_mean          0.000 

 

loop_ 

 _atom_site_label 

 _atom_site_type_symbol 

 _atom_site_fract_x 

 _atom_site_fract_y 

 _atom_site_fract_z 

 _atom_site_U_iso_or_equiv 

 _atom_site_adp_type 

 _atom_site_occupancy 

 _atom_site_symmetry_multiplicity 

 _atom_site_calc_flag 

 _atom_site_refinement_flags 

 _atom_site_disorder_assembly 

 _atom_site_disorder_group 

P1 P 0.36357(9) 0.33576(2) 0.34308(7) 0.0530(2) Uani 1 1 d . . . 

N1 N 0.3341(3) 0.44543(8) 0.3405(2) 0.0517(5) Uani 1 1 d . . . 

O1 O -0.2602(3) 0.62607(10) 0.0469(2) 0.0860(7) Uani 1 1 d . . . 

H1A H -0.2468 0.6375 -0.0321 0.129 Uiso 1 1 calc R . . 

O2 O 0.2194(3) 0.44417(9) 0.4347(2) 0.0797(6) Uani 1 1 d . . . 

O3 O 0.2378(3) 0.33288(8) 0.2114(2) 0.0726(6) Uani 1 1 d . . . 

O4 O 0.2690(2) 0.32114(9) 0.4771(2) 0.0683(5) Uani 1 1 d . . . 

O5 O 0.5323(3) 0.29466(7) 0.3543(2) 0.0719(5) Uani 1 1 d . . . 

C1 C -0.1159(4) 0.59200(11) 0.0933(2) 0.0587(6) Uani 1 1 d . . . 

C2 C -0.1255(4) 0.56323(12) 0.2188(3) 0.0624(7) Uani 1 1 d . . . 

H2A H -0.2272 0.5684 0.2685 0.075 Uiso 1 1 calc R . . 

C3 C 0.0137(3) 0.52730(10) 0.2700(2) 0.0538(5) Uani 1 1 d . . . 

H3B H 0.0059 0.5087 0.3545 0.065 Uiso 1 1 calc R . . 

C4 C 0.1664(3) 0.51841(9) 0.1964(2) 0.0474(5) Uani 1 1 d . . . 

C5 C 0.1747(4) 0.54884(10) 0.0713(2) 0.0569(6) Uani 1 1 d . . . 

H5A H 0.2770 0.5444 0.0218 0.068 Uiso 1 1 calc R . . 

C6 C 0.0360(4) 0.58491(10) 0.0205(3) 0.0598(6) Uani 1 1 d . . . 

H6A H 0.0443 0.6044 -0.0626 0.072 Uiso 1 1 calc R . . 

C7 C 0.3161(3) 0.47926(9) 0.2333(2) 0.0513(5) Uani 1 1 d . . . 

H7A H 0.4094 0.4781 0.1741 0.062 Uiso 1 1 calc R . . 

C8 C 0.4861(3) 0.40263(9) 0.3639(2) 0.0498(5) Uani 1 1 d . . . 

C9 C 0.5845(4) 0.41098(13) 0.5123(3) 0.0713(7) Uani 1 1 d . . . 

H9A H 0.6470 0.4464 0.5177 0.107 Uiso 1 1 calc R . . 

H9B H 0.6735 0.3817 0.5336 0.107 Uiso 1 1 calc R . . 

H9C H 0.4948 0.4102 0.5788 0.107 Uiso 1 1 calc R . . 

C10 C 0.6249(4) 0.40596(12) 0.2554(3) 0.0661(7) Uani 1 1 d . . . 

H10A H 0.6903 0.4408 0.2655 0.099 Uiso 1 1 calc R . . 

H10B H 0.5598 0.4034 0.1625 0.099 Uiso 1 1 calc R . . 

H10C H 0.7118 0.3757 0.2701 0.099 Uiso 1 1 calc R . . 

C11 C 0.0672(4) 0.32641(16) 0.4839(4) 0.0925(11) Uani 1 1 d . . . 

H11A H 0.0357 0.3652 0.4979 0.111 Uiso 1 1 calc R . . 

H11B H 0.0001 0.3139 0.3960 0.111 Uiso 1 1 calc R . . 

C12 C 0.0153(6) 0.2936(2) 0.5969(6) 0.1280(17) Uani 1 1 d . . . 

H12A H -0.1160 0.2968 0.6008 0.192 Uiso 1 1 calc R . . 

H12B H 0.0805 0.3065 0.6838 0.192 Uiso 1 1 calc R . . 

H12C H 0.0462 0.2552 0.5824 0.192 Uiso 1 1 calc R . . 

C13 C 0.4960(6) 0.23437(13) 0.3416(6) 0.1346(19) Uani 1 1 d . . . 

H13A H 0.4094 0.2243 0.4076 0.161 Uiso 1 1 calc R . . 

H13B H 0.4357 0.2270 0.2477 0.161 Uiso 1 1 calc R . . 

C14 C 0.6402(8) 0.20218(18) 0.3639(8) 0.183(3) Uani 1 1 d . . . 

H14A H 0.6020 0.1639 0.3531 0.274 Uiso 1 1 calc R . . 

H14B H 0.6995 0.2081 0.4576 0.274 Uiso 1 1 calc R . . 

H14C H 0.7258 0.2107 0.2973 0.274 Uiso 1 1 calc R . . 

 

loop_ 

 _atom_site_aniso_label 

 _atom_site_aniso_U_11 

 _atom_site_aniso_U_22 

 _atom_site_aniso_U_33 

 _atom_site_aniso_U_23 

 _atom_site_aniso_U_13 

 _atom_site_aniso_U_12 

P1 0.0544(4) 0.0429(3) 0.0602(4) 0.0094(3) 0.0001(3) 0.0009(3) 

N1 0.0570(11) 0.0445(10) 0.0552(11) 0.0033(8) 0.0137(9) 0.0026(8) 

O1 0.0923(15) 0.0980(16) 0.0670(11) 0.0088(11) 0.0063(10) 0.0442(13) 

O2 0.0894(14) 0.0783(13) 0.0791(13) 0.0320(10) 0.0427(11) 0.0313(11) 

O3 0.0871(14) 0.0564(11) 0.0692(12) 0.0043(8) -0.0132(10) -0.0047(9) 

O4 0.0540(10) 0.0741(12) 0.0763(12) 0.0300(9) 0.0053(9) -0.0007(8) 

O5 0.0635(11) 0.0445(9) 0.1074(15) 0.0062(9) 0.0086(10) 0.0068(8) 

C1 0.0682(15) 0.0565(13) 0.0494(12) -0.0050(10) -0.0014(11) 0.0147(12) 

C2 0.0637(15) 0.0719(17) 0.0529(13) -0.0042(11) 0.0114(11) 0.0137(13) 

C3 0.0610(13) 0.0564(13) 0.0448(11) -0.0006(10) 0.0091(10) 0.0030(11) 

C4 0.0544(12) 0.0423(11) 0.0458(10) -0.0034(9) 0.0073(9) -0.0020(9) 

C5 0.0635(14) 0.0561(13) 0.0537(12) 0.0059(10) 0.0174(11) 0.0042(11) 

C6 0.0759(17) 0.0538(14) 0.0500(12) 0.0056(10) 0.0085(11) 0.0050(12) 

C7 0.0572(13) 0.0463(12) 0.0521(12) 0.0013(10) 0.0136(10) -0.0013(10) 

C8 0.0521(12) 0.0429(11) 0.0549(12) 0.0017(9) 0.0076(10) 0.0017(9) 

C9 0.0734(17) 0.0692(17) 0.0676(16) -0.0050(13) -0.0085(13) 0.0034(14) 

C10 0.0581(14) 0.0585(14) 0.0855(18) 0.0095(13) 0.0241(13) 0.0039(12) 

C11 0.0547(16) 0.098(2) 0.126(3) 0.040(2) 0.0188(18) 0.0049(16) 

C12 0.082(3) 0.133(4) 0.176(4) 0.055(3) 0.046(3) 0.003(2) 

C13 0.109(3) 0.0433(17) 0.243(6) 0.009(2) -0.018(3) 0.0054(18) 

C14 0.142(4) 0.058(2) 0.361(10) 0.004(4) 0.084(6) 0.023(3) 

 

_geom_special_details 

; 

 All esds (except the esd in the dihedral angle between two l.s. planes) 

 are estimated using the full covariance matrix.  The cell esds are taken 

 into account individually in the estimation of esds in distances, angles 

 and torsion angles; correlations between esds in cell parameters are only 

 used when they are defined by crystal symmetry.  An approximate (isotropic) 

 treatment of cell esds is used for estimating esds involving l.s. planes. 

; 

 

loop_ 

 _geom_bond_atom_site_label_1 

 _geom_bond_atom_site_label_2 

 _geom_bond_distance 

 _geom_bond_site_symmetry_2 

 _geom_bond_publ_flag 

P1 O3 1.4714(19) . ? 

P1 O4 1.5608(19) . ? 

P1 O5 1.5647(19) . ? 

P1 C8 1.832(2) . ? 

N1 O2 1.293(3) . ? 

N1 C7 1.302(3) . ? 

N1 C8 1.503(3) . ? 

O1 C1 1.361(3) . ? 

O1 H1A 0.8200 . ? 

O4 C11 1.477(3) . ? 

O5 C13 1.471(4) . ? 

C1 C6 1.379(4) . ? 

C1 C2 1.393(4) . ? 

C2 C3 1.374(3) . ? 

C2 H2A 0.9300 . ? 

C3 C4 1.394(3) . ? 

C3 H3B 0.9300 . ? 

C4 C5 1.409(3) . ? 

C4 C7 1.448(3) . ? 

C5 C6 1.373(4) . ? 

C5 H5A 0.9300 . ? 

C6 H6A 0.9300 . ? 

C7 H7A 0.9300 . ? 

C8 C10 1.527(3) . ? 

C8 C9 1.528(3) . ? 

C9 H9A 0.9600 . ? 

C9 H9B 0.9600 . ? 

C9 H9C 0.9600 . ? 

C10 H10A 0.9600 . ? 

C10 H10B 0.9600 . ? 

C10 H10C 0.9600 . ? 

C11 C12 1.422(5) . ? 

C11 H11A 0.9700 . ? 

C11 H11B 0.9700 . ? 

C12 H12A 0.9600 . ? 

C12 H12B 0.9600 . ? 

C12 H12C 0.9600 . ? 

C13 C14 1.297(6) . ? 

C13 H13A 0.9700 . ? 

C13 H13B 0.9700 . ? 

C14 H14A 0.9600 . ? 

C14 H14B 0.9600 . ? 

C14 H14C 0.9600 . ? 

 

loop_ 

 _geom_angle_atom_site_label_1 

 _geom_angle_atom_site_label_2 

 _geom_angle_atom_site_label_3 

 _geom_angle 

 _geom_angle_site_symmetry_1 

 _geom_angle_site_symmetry_3 

 _geom_angle_publ_flag 

O3 P1 O4 113.96(12) . . ? 

O3 P1 O5 115.69(12) . . ? 

O4 P1 O5 102.40(11) . . ? 

O3 P1 C8 112.34(11) . . ? 

O4 P1 C8 111.09(12) . . ? 

O5 P1 C8 100.20(11) . . ? 

O2 N1 C7 123.2(2) . . ? 

O2 N1 C8 113.52(17) . . ? 

C7 N1 C8 123.2(2) . . ? 

C1 O1 H1A 109.5 . . ? 

C11 O4 P1 123.09(19) . . ? 

C13 O5 P1 118.8(2) . . ? 

O1 C1 C6 122.5(2) . . ? 

O1 C1 C2 117.8(2) . . ? 

C6 C1 C2 119.7(2) . . ? 

C3 C2 C1 120.7(2) . . ? 

C3 C2 H2A 119.6 . . ? 

C1 C2 H2A 119.6 . . ? 

C2 C3 C4 120.6(2) . . ? 

C2 C3 H3B 119.7 . . ? 

C4 C3 H3B 119.7 . . ? 

C3 C4 C5 117.6(2) . . ? 

C3 C4 C7 126.3(2) . . ? 

C5 C4 C7 116.1(2) . . ? 

C6 C5 C4 121.8(2) . . ? 

C6 C5 H5A 119.1 . . ? 

C4 C5 H5A 119.1 . . ? 

C5 C6 C1 119.5(2) . . ? 

C5 C6 H6A 120.2 . . ? 

C1 C6 H6A 120.2 . . ? 

N1 C7 C4 126.9(2) . . ? 

N1 C7 H7A 116.5 . . ? 

C4 C7 H7A 116.5 . . ? 

N1 C8 C10 113.07(19) . . ? 

N1 C8 C9 107.8(2) . . ? 

C10 C8 C9 110.5(2) . . ? 

N1 C8 P1 104.00(15) . . ? 

C10 C8 P1 108.71(17) . . ? 

C9 C8 P1 112.65(18) . . ? 

C8 C9 H9A 109.5 . . ? 

C8 C9 H9B 109.5 . . ? 

H9A C9 H9B 109.5 . . ? 

C8 C9 H9C 109.5 . . ? 

H9A C9 H9C 109.5 . . ? 

H9B C9 H9C 109.5 . . ? 

C8 C10 H10A 109.5 . . ? 

C8 C10 H10B 109.5 . . ? 

H10A C10 H10B 109.5 . . ? 

C8 C10 H10C 109.5 . . ? 

H10A C10 H10C 109.5 . . ? 

H10B C10 H10C 109.5 . . ? 

C12 C11 O4 109.6(3) . . ? 

C12 C11 H11A 109.8 . . ? 

O4 C11 H11A 109.8 . . ? 

C12 C11 H11B 109.8 . . ? 

O4 C11 H11B 109.8 . . ? 

H11A C11 H11B 108.2 . . ? 

C11 C12 H12A 109.5 . . ? 

C11 C12 H12B 109.5 . . ? 

H12A C12 H12B 109.5 . . ? 

C11 C12 H12C 109.5 . . ? 

H12A C12 H12C 109.5 . . ? 

H12B C12 H12C 109.5 . . ? 

C14 C13 O5 115.9(4) . . ? 

C14 C13 H13A 108.3 . . ? 

O5 C13 H13A 108.3 . . ? 

C14 C13 H13B 108.3 . . ? 

O5 C13 H13B 108.3 . . ? 

H13A C13 H13B 107.4 . . ? 

C13 C14 H14A 109.5 . . ? 

C13 C14 H14B 109.5 . . ? 

H14A C14 H14B 109.5 . . ? 

C13 C14 H14C 109.5 . . ? 

H14A C14 H14C 109.5 . . ? 

H14B C14 H14C 109.5 . . ? 

 

loop_ 

 _geom_hbond_atom_site_label_D 

 _geom_hbond_atom_site_label_H 

 _geom_hbond_atom_site_label_A 

 _geom_hbond_distance_DH 

 _geom_hbond_distance_HA 

 _geom_hbond_distance_DA 

 _geom_hbond_angle_DHA 

 _geom_hbond_site_symmetry_A 

O1 H1A O3  0.82 1.86 2.682(3) 174.4 3_565 

 

_diffrn_measured_fraction_theta_max    0.998 

_diffrn_reflns_theta_full              27.47 

_diffrn_measured_fraction_theta_full   0.998 

_refine_diff_density_max    0.451 

_refine_diff_density_min   -0.249 

_refine_diff_density_rms    0.054 
